# Supplementary material for: Causes of hospital admission and mortality among 6683 people who use heroin: A cohort study comparing relative and absolute risks
Source: PubMed Central journal article supplement (PMC6891224; doi:10.1016/j.drugalcdep.2019.06.027), 2019-11-01
Supplement: mmc1.pdf [file mmc1.pdf]

## **Supplementary Information**

1. Calculation of excess events
2. Comparison with existing data linkage studies of mortality among opiate users in England and Scotland
3. Comparison with existing data linkage studies of hospital admission among opiate users in Scotland
4. ICD-10 codes for drug-related events
5. References for supplementary material

# 1 Calculation of excess events

We calculated excess events (excess deaths or excess hospital admissions) using the following formula:

$$observed - \sum_{j=1}^k reference_j \times time_j$$

Where ‘observed’ is the number of events observed in the study cohort, ‘reference’ is the annual rate of events in the reference population, ‘time’ is the number of years of follow-up in the study cohort, and ‘j’ is the demographic stratum (in this case age and sex groups, where k = 10 since our study had 5 age groups and 2 sex groups).

We have posted a version of the analysis code that only requires publicly available data and calculated all-cause excess deaths here: <https://osf.io/xbzh8/>. This code produces the following table:

|              |        | England & Wales, 2006-2016 |                               |                                                   | Study cohort      |                    |                 |
|--------------|--------|----------------------------|-------------------------------|---------------------------------------------------|-------------------|--------------------|-----------------|
| Age group    | Sex    | All-cause deaths           | Aggregate population estimate | Reference mortality rate per 100,000 person-years | All-cause deaths* | Years of follow-up | Expected deaths |
| 18-24        | Male   | 15,491                     | 28,752,356                    | 54                                                | 17                | 829                | 0.4             |
| 25-34        |        | 31,278                     | 41,385,902                    | 76                                                | 115               | 8,573              | 6.5             |
| 35-44        |        | 63,932                     | 42,725,281                    | 150                                               | 230               | 16,308             | 24.4            |
| 45-54        |        | 133,208                    | 41,680,133                    | 320                                               | 149               | 12,529             | 40.0            |
| 55-64        |        | 282,232                    | 35,193,711                    | 802                                               | 44                | 2,917              | 23.4            |
| 18-24        | Female | 6,216                      | 28,001,093                    | 22                                                | 15                | 555                | 0.1             |
| 25-34        |        | 15,281                     | 41,453,769                    | 37                                                | 51                | 4,311              | 1.6             |
| 35-44        |        | 38,316                     | 43,289,966                    | 89                                                | 68                | 5,700              | 5.0             |
| 45-54        |        | 90,014                     | 42,485,704                    | 212                                               | 38                | 3,222              | 6.8             |
| 55-64        |        | 189,671                    | 36,286,801                    | 523                                               | 4                 | 707                | 3.7             |
| <b>Total</b> |        | <b>865,639</b>             | <b>381,254,716</b>            | <b>227</b>                                        | <b>731</b>        | <b>55,650</b>      | <b>112.0</b>    |

\* A random value between -2 and +2 has been added to values in this column to avoid disclosing small counts. The stratum-specific number of deaths in the cohort is provided for interest and are not required for calculation of excess mortality, which uses the total number of deaths in the study cohort.

In this data, the standardised mortality ratio is:

$$731/112.0 = 6.52 \text{ (95\% CI 6.06 – 7.02)}$$

While the number of excess deaths is:

$$731-112.0 = 619 \text{ (95\% CI 567 – 674)}$$

The confidence intervals are calculated using an exact poisson method (Garwood, 1936), which is also shown in the publicly available code.

## 2 Comparison with existing data linkage studies of mortality among opiate users in England and Scotland

| ICD-10 group       | PRESENT STUDY<br>South London, England<br>2006-2019<br>Participants: 6,833<br>Person-years: 55,639 |       |       |        |      | Pierce et al., 2015<br>England<br>2005-2009<br>Participants: 198,247<br>Person-years: 541,891 |      |       |        |      | Merrall et al., 2012<br>Scotland<br>1996-2006<br>Participants: 32,781<br>Person-years: 256,275 |      |       |        |      |
|--------------------|----------------------------------------------------------------------------------------------------|-------|-------|--------|------|-----------------------------------------------------------------------------------------------|------|-------|--------|------|------------------------------------------------------------------------------------------------|------|-------|--------|------|
|                    | Obs                                                                                                | CMR   | Exp   | Excess | SMR  | Obs                                                                                           | CMR  | Exp   | Excess | SMR  | Obs                                                                                            | CMR  | Exp   | Excess | SMR  |
| Total              | 732                                                                                                | 131.6 | 110.7 | 621    | 6.6  | 3974                                                                                          | 73.3 | 695   | 3279   | 5.7  | 1813                                                                                           | 70.7 | 378.2 | 1434.8 | 4.8  |
| Drug-related       | 266                                                                                                | 47.8  | 5.6   | 260    | 47.8 | 1715                                                                                          | 31.6 |       |        |      | 915                                                                                            | 35.7 | 67.9  | 847.1  | 13.5 |
| Non-drug-related   | 466                                                                                                | 83.8  | 105.2 | 361    | 4.4  | 2259                                                                                          | 41.7 |       |        |      | 898                                                                                            | 35   | 310.3 | 587.7  | 2.9  |
| I: Infections      | 47                                                                                                 | 8.4   | 1.7   | 45     | 27.8 | 159                                                                                           | 2.9  | 12.6  | 146.4  | 12.6 | 62                                                                                             | 2.4  | 6.6   | 55.4   | 9.4  |
| Viral hepatitis    | 22                                                                                                 | 4.0   | 0.3   | 22     | 72.1 | 82                                                                                            | 1.5  | 1.4   | 80.6   | 58.6 |                                                                                                |      |       |        |      |
| HIV                | 17                                                                                                 | 3.1   | 0.4   | 17     | 38.6 | 31                                                                                            | 0.6  | 4.4   | 26.6   | 7    |                                                                                                |      |       |        |      |
| II: Cancers        | 69                                                                                                 | 12.4  | 34.7  | 34     | 2.0  | 296                                                                                           | 5.5  | 166.3 | 129.7  | 1.8  | 60                                                                                             | 2.3  | 55.6  | 4.4    | 1.1  |
| Digestive          | 28                                                                                                 | 5.0   | 10.1  | 18     | 2.8  | 38                                                                                            | 0.7  | 4.1   | 33.9   | 9.3  |                                                                                                |      |       |        |      |
| Lung               | 25                                                                                                 | 4.5   | 7.0   | 18     | 3.6  |                                                                                               |      |       |        |      |                                                                                                |      |       |        |      |
| Other              | 16                                                                                                 | 2.9   | 17.6  | -2     | 0.9  |                                                                                               |      |       |        |      |                                                                                                |      |       |        |      |
| IX: Cardiovascular | 74                                                                                                 | 13.3  | 26.8  | 47     | 2.8  | 418                                                                                           | 7.7  | 134.1 | 283.9  | 3.1  | 105                                                                                            | 4.1  | 53.3  | 51.7   | 2.0  |
| IHD                | 31                                                                                                 | 5.6   | 15.7  | 15     | 2.0  |                                                                                               |      |       |        |      |                                                                                                |      |       |        |      |
| Other              | 18                                                                                                 | 3.2   | 3.8   | 14     | 4.7  |                                                                                               |      |       |        |      |                                                                                                |      |       |        |      |
| Other heart        | 14                                                                                                 | 2.5   | 3.1   | 11     | 4.5  |                                                                                               |      |       |        |      |                                                                                                |      |       |        |      |
| Stroke             | 11                                                                                                 | 2.0   | 4.1   | 7      | 2.7  |                                                                                               |      |       |        |      |                                                                                                |      |       |        |      |
| X: Respiratory     | 64                                                                                                 | 11.5  | 6.1   | 58     | 10.6 | 259                                                                                           | 4.8  | 29    | 230    | 8.9  | 55                                                                                             | 2.1  | 11.4  | 43.6   | 4.8  |
| COPD               | 48                                                                                                 | 8.6   | 2.5   | 45     | 19.0 | 130                                                                                           | 2.4  | 10.4  | 119.6  | 12.5 |                                                                                                |      |       |        |      |
| Flu & Pneumonia    | 14                                                                                                 | 2.5   | 2.2   | 12     | 6.3  | 102                                                                                           | 1.9  | 11.6  | 90.4   | 8.8  |                                                                                                |      |       |        |      |
| XI: Digestive      | 109                                                                                                | 19.6  | 11.7  | 97     | 9.3  | 423                                                                                           | 7.8  | 65.7  | 357.3  | 6.4  | 147                                                                                            | 5.7  | 32.4  | 114.6  | 4.5  |
| Liver              | 84                                                                                                 | 15.1  | 8.8   | 75     | 9.6  | 345                                                                                           | 6.4  | 49.5  | 295.5  | 7    |                                                                                                |      |       |        |      |
| Other              | 25                                                                                                 | 4.5   | 2.9   | 22     | 8.6  |                                                                                               |      |       |        |      |                                                                                                |      |       |        |      |
| XX: External       | 60                                                                                                 | 10.8  | 13.6  | 46     | 4.4  | 482                                                                                           | 8.9  | 146.3 | 335.7  | 3.3  |                                                                                                |      |       |        |      |
| Accidents          | 36                                                                                                 | 6.5   | 6.0   | 30     | 6.0  |                                                                                               |      |       |        |      |                                                                                                |      |       |        |      |
| Other              | 13                                                                                                 | 2.3   | 2.1   | 11     | 6.1  |                                                                                               |      |       |        |      |                                                                                                |      |       |        |      |
| Self-harm          | 11                                                                                                 | 2.0   | 5.5   | 5      | 2.0  |                                                                                               |      |       |        |      |                                                                                                |      |       |        |      |
| Other              | 43                                                                                                 | 7.7   | 10.6  | 32     | 4.0  |                                                                                               |      |       |        |      |                                                                                                |      |       |        |      |

Obs = observed number of deaths

CMR = crude mortality rate (per 10,000 person-years)

Exp = Expected deaths (based on age- and sex-specific specific admission rates in the general population)

SMR = Standardised mortality ratio

IHD = Ischaemic heart disease

COPD = Chronic obstructive pulmonary disease

### 3 Comparison with existing data linkage studies of hospital admissions among opiate users in Scotland

| ICD-10 group                | PRESENT STUDY<br>South London, England<br>2006-2017<br>Participants: 6,833<br>Person-years: 44,590 |       |          |          |       | Merrall et al., 2013<br>Scotland<br>1996-2006<br>Participants: 32,782<br>Person-years: 256,311 |       |          |        |     |
|-----------------------------|----------------------------------------------------------------------------------------------------|-------|----------|----------|-------|------------------------------------------------------------------------------------------------|-------|----------|--------|-----|
|                             | Observed                                                                                           | CAR   | Expected | Excess   | SAR   | Observed                                                                                       | CAR   | Expected | Excess | SAR |
| Total                       | 21,494                                                                                             | 482.0 | 6,826.0  | 14,668.0 | 3.1   | 75,151                                                                                         | 293.2 | 30,076   | 45,075 | 2.5 |
| Drug-related                | 3,052                                                                                              | 68.4  | 10.4     | 3,041.6  | 293.2 |                                                                                                |       |          |        |     |
| Non-drug-related            | 18,442                                                                                             | 413.6 | 6,652.2  | 11,789.8 | 2.8   |                                                                                                |       |          |        |     |
| I: Infections               | 351                                                                                                | 7.9   | 83.8     | 267.2    | 4.2   | 1,928                                                                                          | 7.5   | 521      | 1,407  | 3.7 |
| II: Cancers                 | 396                                                                                                | 8.9   | 786.6    | -390.6   | 0.5   | 1,006                                                                                          | 3.9   | 1,353    | -347   | 0.7 |
| IV: ENM                     | 271                                                                                                | 6.1   | 118.4    | 152.6    | 2.3   | 1,135                                                                                          | 4.4   | 592      | 543    | 1.9 |
| V: Mental                   | 2,077                                                                                              | 46.6  | 22.2     | 2,054.8  | 93.7  | 9,046                                                                                          | 35.3  | *        | *      | *   |
| Personality disorder        | 307                                                                                                | 6.9   | 0.9      | 306.1    | 342.9 |                                                                                                |       |          |        |     |
| Other                       | 392                                                                                                | 8.8   | 6.0      | 386.0    | 64.8  |                                                                                                |       |          |        |     |
| Psychosis                   | 305                                                                                                | 6.8   | 2.0      | 303.0    | 154.2 |                                                                                                |       |          |        |     |
| Alcohol                     | 1,073                                                                                              | 24.1  | 13.3     | 1,059.7  | 81.0  |                                                                                                |       |          |        |     |
| VI: Nervous                 | 366                                                                                                | 8.2   | 121.4    | 244.6    | 3.0   | 1,006                                                                                          | 3.9   | 701      | 305    | 1.4 |
| IX: Cardiovascular diseases | 1,109                                                                                              | 24.9  | 321.3    | 787.7    | 3.5   | 4,312                                                                                          | 16.8  | 1,155    | 3,157  | 3.7 |
| X: Respiratory              | 1,762                                                                                              | 39.5  | 187.6    | 1,574.4  | 9.4   | 3,837                                                                                          | 15.0  | 1,878    | 1,959  | 2.0 |
| COPD                        | 847                                                                                                | 19.0  | 35.0     | 812.0    | 24.2  |                                                                                                |       |          |        |     |
| Flu & Pneumonia             | 519                                                                                                | 11.6  | 30.7     | 488.3    | 16.9  |                                                                                                |       |          |        |     |
| Other                       | 396                                                                                                | 8.9   | 121.9    | 274.1    | 3.2   |                                                                                                |       |          |        |     |
| XI: Digestive               | 2,873                                                                                              | 64.4  | 933.1    | 1,939.9  | 3.1   | 6,823                                                                                          | 26.6  | 4,323    | 2,500  | 1.6 |
| Gall bladder & pancreas     | 406                                                                                                | 9.1   | 59.5     | 346.5    | 6.8   |                                                                                                |       |          |        |     |
| Intestines                  | 302                                                                                                | 6.8   | 189.8    | 112.2    | 1.6   |                                                                                                |       |          |        |     |
| Liver                       | 423                                                                                                | 9.5   | 15.0     | 408.0    | 28.1  |                                                                                                |       |          |        |     |
| Oral cavity                 | 764                                                                                                | 17.1  | 248.1    | 515.9    | 3.1   |                                                                                                |       |          |        |     |
| Other                       | 524                                                                                                | 11.8  | 263.5    | 260.5    | 2.0   |                                                                                                |       |          |        |     |
| Stomach                     | 454                                                                                                | 10.2  | 157.3    | 296.7    | 2.9   |                                                                                                |       |          |        |     |
| XII: Skin                   | 1,460                                                                                              | 32.7  | 165.8    | 1,294.2  | 8.8   | 5,041                                                                                          | 19.7  | 1,421    | 3,620  | 3.5 |
| Infections                  | 1,134                                                                                              | 25.4  | 60.9     | 1,073.1  | 18.6  |                                                                                                |       |          |        |     |
| Other                       | 326                                                                                                | 7.3   | 104.9    | 221.1    | 3.1   |                                                                                                |       |          |        |     |
| XIII: Musculoskeletal       | 942                                                                                                | 21.1  | 373.9    | 568.1    | 2.5   | 2,610                                                                                          | 10.2  | 1,635    | 975    | 1.6 |
| Arthropathies               | 324                                                                                                | 7.3   | 166.9    | 157.1    | 1.9   |                                                                                                |       |          |        |     |
| Other                       | 316                                                                                                | 7.1   | 131.0    | 185.0    | 2.4   |                                                                                                |       |          |        |     |
| Soft tissue                 | 302                                                                                                | 6.8   | 76.0     | 226.0    | 4.0   |                                                                                                |       |          |        |     |
| XIV: Genitourinary          | 659                                                                                                | 14.8  | 1,372.3  | -713.3   | 0.5   | 2,347                                                                                          | 9.2   | 2,085    | 262    | 1.1 |
| XIX: External               | 2,000                                                                                              | 44.9  | 314.8    | 1,685.2  | 6.4   |                                                                                                |       |          |        |     |
| Head injury                 | 670                                                                                                | 15.0  | 57.6     | 612.4    | 11.6  |                                                                                                |       |          |        |     |
| Medical                     | 253                                                                                                | 5.7   | 57.9     | 195.1    | 4.4   |                                                                                                |       |          |        |     |
| Other                       | 1,077                                                                                              | 24.2  | 199.2    | 877.8    | 5.4   |                                                                                                |       |          |        |     |
| XV-XVI: Perinatal           | 1,053                                                                                              | 23.6  | 816.3    | 236.7    | 1.3   |                                                                                                |       |          |        |     |
| XVIII: Unknown              | 2,205                                                                                              | 49.5  | 528.9    | 1,676.1  | 4.2   |                                                                                                |       |          |        |     |
| XXI: Health services        | 626                                                                                                | 14.0  | 336.6    | 289.4    | 1.9   |                                                                                                |       |          |        |     |
| Other                       | 292                                                                                                | 6.5   | 332.6    | -40.6    | 0.9   |                                                                                                |       |          |        |     |

CAR = crude admission rate (per 1,000 person-years)

Exp. = Expected admissions (based on age- and sex-specific admission rates in the general population)

SAR = Standardised admission ratio

ENM = Endocrine, nutritional and metabolic (including diabetes)

COPD = Chronic obstructive pulmonary disease

\* Could not be calculated because expected admissions are not disaggregated by drug-related events

## 4 ICD-10 codes for drug-related events

The following codes were used to identify drug-related deaths and hospital admissions. The codes were developed by the Office for National Statistics (Office for National Statistics, 2018).

| <b>Description</b>                                                               | <b>ICD-10 Codes</b> |
|----------------------------------------------------------------------------------|---------------------|
| Mental and behavioural disorders due to drug use (excluding alcohol and tobacco) | F11–F16, F18–F19    |
| Accidental poisoning by drugs, medicaments and biological substances             | X40–X44             |
| Intentional self-poisoning by drugs, medicaments and biological substances       | X60–X64             |
| Assault by drugs, medicaments and biological substances                          | X85                 |
| Poisoning by drugs, medicaments and biological substances, undetermined intent   | Y10–Y14             |

## 5 References for supplementary material

- Garwood, F., 1936. Fiducial Limits for the Poisson Distribution. *Biometrika* 28, 437.  
<https://doi.org/10.2307/2333958>
- Merrall, E., Bird, S., Hutchinson, S., 2013. A record linkage study of hospital episodes for drug treatment clients in Scotland, 1996–2006. *Addict. Res. Theory* 21, 52–61. <https://doi.org/10.3109/16066359.2012.690052>
- Merrall, E.L.C., Bird, S.M., Hutchinson, S.J., 2012. Mortality of those who attended drug services in Scotland 1996–2006: Record-linkage study. *Int. J. Drug Policy* 23, 24–32.  
<https://doi.org/10.1016/j.drugpo.2011.05.010>
- Office for National Statistics, 2018. Deaths related to drug poisoning in England and Wales: 2017 registrations.
- Pierce, M., Bird, S.M., Hickman, M., Millar, T., 2015. National record linkage study of mortality for a large cohort of opioid users ascertained by drug treatment or criminal justice sources in England, 2005–2009. *Drug Alcohol Depend.* 146, 17–23. <https://doi.org/10.1016/j.drugaldep.2014.09.782>
